# Supplementary material for: Regulation of the Arginine Deiminase System by ArgR2 Interferes with Arginine Metabolism and Fitness of Streptococcus pneumoniae
Source: PubMed Central journal article supplement — mBio. 2014 Dec 23;5(6):e01858-14. doi: 10.1128/mBio.01858-14 (PMC4278536; doi:10.1128/mbio.01858-14), 2014-12-23
Supplement: mbo006142102st1.pdf [file mbo006142102st1.pdf]

**TABLE S1** Bacterial strains used in this study

| Strain                                                                                  | Description                                                                                                                            | Source                            |
|-----------------------------------------------------------------------------------------|----------------------------------------------------------------------------------------------------------------------------------------|-----------------------------------|
| <b><i>S. pneumoniae</i> wild-type strains</b>                                           |                                                                                                                                        |                                   |
| P34                                                                                     | serotype 1                                                                                                                             | ATCC 33400                        |
| P35                                                                                     | serotype 2                                                                                                                             | NCTC 7466                         |
| P37                                                                                     | serotype 35A                                                                                                                           | NCTC 10319                        |
| P39                                                                                     | serotype 3                                                                                                                             | ATCC 6303                         |
| P41                                                                                     | serotype 5                                                                                                                             | ATCC 6305                         |
| P51                                                                                     | serotype 2                                                                                                                             | ATCC 11733                        |
| P52                                                                                     | serotype 1                                                                                                                             | ATCC 12213                        |
| P53                                                                                     | serotype 1                                                                                                                             | Statens Serum Institute           |
| P54                                                                                     | serotype 3                                                                                                                             | Statens Serum Institute           |
| P55                                                                                     | serotype 4                                                                                                                             | Statens Serum Institute           |
| P56                                                                                     | serotype 6A                                                                                                                            | Statens Serum Institute           |
| P57                                                                                     | serotype 6B                                                                                                                            | Statens Serum Institute           |
| P58                                                                                     | serotype 8                                                                                                                             | Statens Serum Institute           |
| P59                                                                                     | serotype 7F                                                                                                                            | Statens Serum Institute           |
| P60                                                                                     | serotype 9V                                                                                                                            | Statens Serum Institute           |
| P63                                                                                     | serotype 19F                                                                                                                           | Statens Serum Institute           |
| P64                                                                                     | serotype 23F                                                                                                                           | Statens Serum Institute           |
| P139                                                                                    | R6, nonencapsulated                                                                                                                    | Tomasz and Hotchkiss, 1964 (1)    |
| P173                                                                                    | R800, nonencapsulated, derived from R36A                                                                                               | Holmes <i>et al.</i> , 2001 (2)   |
| P257                                                                                    | D39, serotype 2                                                                                                                        | NCTC 7466                         |
| P261                                                                                    | TIGR4, serotype 4                                                                                                                      | Tettelin <i>et al.</i> , 2001 (3) |
| P309                                                                                    | G54, serotype 19F                                                                                                                      | Dopazo <i>et al.</i> , 2001 (4)   |
| <b><i>S. pneumoniae</i> mutant strains</b>                                              |                                                                                                                                        |                                   |
| PN111                                                                                   | D39 $\Delta$ <i>cps</i> ::Km <sup>r</sup>                                                                                              | Jensch <i>et al.</i> , 2010 (5)   |
| PN259                                                                                   | TIGR4 $\Delta$ <i>cps</i> ::Km <sup>r</sup>                                                                                            | This study                        |
| PN315                                                                                   | TIGR4 <i>lux</i>                                                                                                                       | This study                        |
| PN321                                                                                   | D39 $\Delta$ <i>cps</i> $\Delta$ <i>arcA-T</i> ::Erm <sup>r</sup>                                                                      | This study                        |
| PN322                                                                                   | TIGR4 $\Delta$ <i>cps</i> $\Delta$ <i>arcA-T</i> ::Erm <sup>r</sup>                                                                    | This study                        |
| PN323                                                                                   | D39 $\Delta$ <i>cps</i> $\Delta$ <i>argR2</i> ::Erm <sup>r</sup>                                                                       | This study                        |
| PN324                                                                                   | TIGR4 $\Delta$ <i>cps</i> $\Delta$ <i>argR2</i> ::Erm <sup>r</sup>                                                                     | This study                        |
| PN325                                                                                   | D39 $\Delta$ <i>cps</i> $\Delta$ <i>argR1</i> ::Erm <sup>r</sup>                                                                       | This study                        |
| PN326                                                                                   | TIGR4 $\Delta$ <i>cps</i> $\Delta$ <i>argR1</i> ::Erm <sup>r</sup>                                                                     | This study                        |
| PN327                                                                                   | D39 $\Delta$ <i>cps</i> $\Delta$ <i>ahrC</i> ::Erm <sup>r</sup>                                                                        | This study                        |
| PN328                                                                                   | TIGR4 $\Delta$ <i>cps</i> $\Delta$ <i>ahrC</i> ::Erm <sup>r</sup>                                                                      | This study                        |
| PN363                                                                                   | D39 $\Delta$ <i>cps</i> $\Delta$ <i>arcA-C</i> ::Erm <sup>r</sup>                                                                      | This study                        |
| PN364                                                                                   | TIGR4 $\Delta$ <i>cps</i> $\Delta$ <i>arcA-C</i> ::Erm <sup>r</sup>                                                                    | This study                        |
| PN376                                                                                   | TIGR4 <i>lux</i> $\Delta$ <i>arcA-T</i> ::Erm <sup>r</sup>                                                                             | This study                        |
| PN377                                                                                   | TIGR4 <i>lux</i> $\Delta$ <i>argR2</i> ::Erm <sup>r</sup>                                                                              | This study                        |
| PN378                                                                                   | D39 <i>lux</i> $\Delta$ <i>arcA-T</i> ::Erm <sup>r</sup>                                                                               | This study                        |
| PN379                                                                                   | D39 <i>lux</i> $\Delta$ <i>argR2</i> ::Erm <sup>r</sup>                                                                                | This study                        |
| PN421                                                                                   | TIGR4 $\Delta$ <i>cps</i> $\Delta$ <i>ply</i> ::Cm <sup>r</sup>                                                                        | This study                        |
| PN422                                                                                   | TIGR4 $\Delta$ <i>cps</i> $\Delta$ <i>ply</i> $\Delta$ <i>arcA-C</i> ::Erm <sup>r</sup>                                                | This study                        |
| PN423                                                                                   | TIGR4 $\Delta$ <i>cps</i> $\Delta$ <i>ply</i> $\Delta$ <i>arcA-T</i> ::Erm <sup>r</sup>                                                | This study                        |
| PN424                                                                                   | TIGR4 $\Delta$ <i>cps</i> $\Delta$ <i>ply</i> $\Delta$ <i>argR2</i> ::Erm <sup>r</sup>                                                 | This study                        |
| PN498                                                                                   | TIGR4 <i>lux</i> $\Delta$ <i>arcA-C</i> ::Erm <sup>r</sup>                                                                             | This study                        |
| PN499                                                                                   | D39 <i>lux</i> $\Delta$ <i>arcA-C</i> ::Erm <sup>r</sup>                                                                               | This study                        |
| <b><i>E. coli</i> strains</b>                                                           |                                                                                                                                        |                                   |
| DH5 $\alpha$                                                                            | $\Delta$ ( <i>lac</i> )U169 <i>endA1 gyrA46 hsdR17 <math>\phi</math>80<math>\Delta</math>(<i>lacZ</i>)M15 recA1 relA1 supE44 thi-1</i> | Novagen                           |
| BL21(DE3)                                                                               | <i>E. coli</i> host for protein expression                                                                                             | Invitrogen                        |
| Cm, chloramphenicol; Km, kanamycin; Erm, erythromycin; Spe, spectinomycin; r, resistant |                                                                                                                                        |                                   |

**SUPPLEMENTAL REFERENCES**

1. **Tomasz A, Hotchkiss RD.** 1964. Regulation of the Transformability of Pneumococcal Cultures by Macromolecular Cell Products. *Proc Natl Acad Sci U S A* **51**:480-487.
2. **Holmes AR, McNab R, Millsap KW, Rohde M, Hammerschmidt S, Mawdsley JL, Jenkinson HF.** 2001. The *pavA* gene of *Streptococcus pneumoniae* encodes a fibronectin-binding protein that is essential for virulence. *Mol Microbiol* **41**:1395-1408.
3. **Tettelin H, Nelson KE, Paulsen IT, Eisen JA, Read TD, Peterson S, Heidelberg J, DeBoy RT, Haft DH, Dodson RJ, Durkin AS, Gwinn M, Kolonay JF, Nelson WC, Peterson JD, Umayam LA, White O, Salzberg SL, Lewis MR, Radune D, Holtzapple E, Khouri H, Wolf AM, Utterback TR,**

- Hansen CL, McDonald LA, Feldblyum TV, Angiuoli S, Dickinson T, Hickey EK, Holt IE, Loftus BJ, Yang F, Smith HO, Venter JC, Dougherty BA, Morrison DA, Hollingshead SK, Fraser CM.** 2001. Complete genome sequence of a virulent isolate of *Streptococcus pneumoniae*. *Science* **293**:498-506.
4. **Dopazo J, Mendoza A, Herrero J, Caldara F, Humbert Y, Friedli L, Guerrier M, Grand-Schenk E, Gandin C, de Francesco M, Polissi A, Buell G, Feger G, Garcia E, Peitsch M, Garcia-Bustos JF.** 2001. Annotated draft genomic sequence from a *Streptococcus pneumoniae* type 19F clinical isolate. *Microb Drug Resist* **7**:99-125.
5. **Jensch I, Gamez G, Rothe M, Ebert S, Fulde M, Somplatzki D, Bergmann S, Petruschka L, Rohde M, Nau R, Hammerschmidt S.** 2010. PavB is a surface-exposed adhesin of *Streptococcus pneumoniae* contributing to nasopharyngeal colonization and airways infections. *Mol Microbiol* **77**:22-43.
