# Supplementary material for: Regulation of the Arginine Deiminase System by ArgR2 Interferes with Arginine Metabolism and Fitness of Streptococcus pneumoniae
Source: PubMed Central journal article supplement — mBio. 2014 Dec 23;5(6):e01858-14. doi: 10.1128/mBio.01858-14 (PMC4278536; doi:10.1128/mbio.01858-14), 2014-12-23
Supplement: mbo006142102st2.pdf [file mbo006142102st2.pdf]

**TABLE S2** Plasmids used in this study

| Plasmid     | Description                                                                                                                                                            | Source                         |
|-------------|------------------------------------------------------------------------------------------------------------------------------------------------------------------------|--------------------------------|
| pGEM-T Easy | Cloning vector for PCR products; Ap <sup>r</sup>                                                                                                                       | Promega                        |
| pGEM695     | pGEM-T easy derivative vector with the subcloned 5' and 3'-end homolog fragments of <i>arcA</i>                                                                        | This study                     |
| pGEM696     | pGEM-T easy derivative vector with the subcloned 5' and 3'-end homolog fragments of <i>arcA</i> interrupted by <i>ermB</i> resistance gene cassettes for mutagenesis   | This study                     |
| pGEM611     | pGEM-T easy derivative vector with the subcloned 5' and 3'-end homolog fragments of <i>arcC</i>                                                                        | This study                     |
| pGEM612     | pGEM-T easy derivative vector with the subcloned 5' and 3'-end homolog fragments of <i>arcC</i> interrupted by <i>ermB</i> resistance gene cassettes for mutagenesis   | This study                     |
| pGEM905     | pGEM-T easy derivative vector with the subcloned 5' and 3'-end homolog fragments of <i>arcA-C</i> interrupted by <i>ermB</i> resistance gene cassettes for mutagenesis | This study                     |
| pGEM615     | pGEM-T easy derivative vector with the subcloned 5' and 3'-end homolog fragments of <i>arcT</i>                                                                        | This study                     |
| pGEM707     | pGEM-T easy derivative vector with the subcloned 5' and 3'-end homolog fragments of <i>arcT</i> interrupted by <i>ermB</i> resistance gene cassettes for mutagenesis   | This study                     |
| pGEM719     | pGEM-T easy derivative vector with the subcloned 5' and 3'-end homolog fragments of <i>arcA-T</i> interrupted by <i>ermB</i> resistance gene cassettes for mutagenesis | This study                     |
| pGEM699     | pGEM-T easy derivative vector with the subcloned 5' and 3'-end homolog fragments of <i>argR2</i>                                                                       | This study                     |
| pGEM700     | pGEM-T easy derivative vector with the subcloned 5' and 3'-end homolog fragments of <i>argR2</i> interrupted by <i>ermB</i> resistance gene cassettes for mutagenesis  | This study                     |
| pGEM703     | pGEM-T easy derivative vector with the subcloned 5' and 3'-end homolog fragments of <i>ahrC</i>                                                                        | This study                     |
| pGEM704     | pGEM-T easy derivative vector with the subcloned 5' and 3'-end homolog fragments of <i>ahrC</i> interrupted by <i>ermB</i> resistance gene cassettes for mutagenesis   | This study                     |
| pGEM708     | pGEM-T easy derivative vector with the subcloned 5' and 3'-end homolog fragments of <i>argR1</i>                                                                       | This study                     |
| pGEM709     | pGEM-T easy derivative vector with the subcloned 5' and 3'-end homolog fragments of <i>argR1</i> interrupted by <i>ermB</i> resistance gene cassettes for mutagenesis  | This study                     |
| pGEM868     | pGEM-T easy derivative vector with the subcloned 5' and 3'-end homolog fragments of <i>ply</i> interrupted by <i>cat</i> resistance gene cassettes for mutagenesis     | This study                     |
| pET28       | a T7-based protein expression vector carrying an N-terminal His tag, Km <sup>r</sup>                                                                                   | Novagen                        |
| pTP1        | pET28 expression vector with a TEV protease                                                                                                                            | Saleh <i>et al.</i> , 2013 (1) |
| pET698      | <i>arcA</i> for protein expression and mouse immunization                                                                                                              | This study                     |
| pET883      | <i>arcB</i> for protein expression and mouse immunization                                                                                                              | This study                     |
| pET885      | <i>arcC</i> for protein expression and mouse immunization                                                                                                              | This study                     |
| pET702      | <i>argR2</i> for protein expression and mouse immunization                                                                                                             | This study                     |
| pET706      | <i>ahrC</i> for protein expression and mouse immunization                                                                                                              | This study                     |
| pET711      | <i>argR1</i> for protein expression and mouse immunization                                                                                                             | This study                     |

Cm, chloramphenicol; Km, kanamycin; Erm, erythromycin; Spe, spectinomycin; r, resistant

## Supplemental REFERENCE

1. Saleh M, Bartual SG, Abdullah MR, Jensch I, Asmat TM, Petruschka L, Pribyl T, Gellert M, Lillig CH, Antelmann H, Hermoso JA, Hammerschmidt S. 2013. Molecular architecture of *Streptococcus pneumoniae* surface thioredoxin-fold lipoproteins crucial for extracellular oxidative stress resistance and maintenance of virulence. *EMBO Mol Med* **5**:1852-1870.
