# Supplementary material for: Regulation of the Arginine Deiminase System by ArgR2 Interferes with Arginine Metabolism and Fitness of Streptococcus pneumoniae
Source: PubMed Central journal article supplement — mBio. 2014 Dec 23;5(6):e01858-14. doi: 10.1128/mBio.01858-14 (PMC4278536; doi:10.1128/mbio.01858-14), 2014-12-23
Supplement: mbo006142102st3.pdf [file mbo006142102st3.pdf]

**TABLE S3** Primers used in this study

| Purpose     | Primer                                | Sequence                                              | Description                                            |
|-------------|---------------------------------------|-------------------------------------------------------|--------------------------------------------------------|
| pGEM695;    | M9 (arcA_fwd)                         | CCTCTCAGAATGCTACTCTCC                                 | Primer for mutagenesis                                 |
| pGEM696;    | M10 (arcA_rev)                        | GCACCTGTTACGAGCAAGCTG                                 | Primer for mutagenesis                                 |
| pGEM611;    | M17 (arcC_fwd)                        | CACATGTTCTCATCACTGAA                                  | Primer for mutagenesis                                 |
| pGEM612;    | M18 (arcC_rev)                        | GTCCCCTGTACCAACTCCCG                                  | Primer for mutagenesis                                 |
| pGEM905;    | M23 (arcT_fwd)                        | CTTCCCAGAAGGCGCAATGC                                  | Primer for mutagenesis                                 |
| pGEM615;    | M24 (arcT_rev)                        | GGAAAAACATATGCAGCC                                    | Primer for mutagenesis                                 |
| pGEM707;    | M55 (arcA_rev_invPCR <i>Bam</i> HI)   | GAAGACCTGAATTGGATCCGAAGACATGTAT                       | Primer for mutagenesis; <i>Bam</i> HI                  |
| pGEM719;    | M56 (arcA_fwd_invPCR <i>Hind</i> III) | GAACGTGAAGAAGCTTAATCGCTGTTCTCGATATTCG                 | Primer for mutagenesis, <i>Hind</i> III                |
| pGEM699;    | M59 (arcC_rev_invPCR <i>Bam</i> HI)   | GGGTCAGAAGAAAGGATCCCATTTCCTCCCAAAGCTAC                | Primer for mutagenesis; <i>Bam</i> HI                  |
| pGEM700;    | M60 (arcC_fwd_invPCR <i>Hind</i> III) | CCAAAAGTAGAAGCAGCTAAAGCTTTTGTCAATGGTCGTCC             | Primer for mutagenesis, <i>Hind</i> III                |
| pGEM703;    | M63 (arcT_rev_invPCR <i>Bam</i> HI)   | TTGAGTACTGAAGGATCCGAAATCAAGGTT                        | Primer for mutagenesis; <i>Bam</i> HI                  |
| pGEM704;    | M64 (arcT_fwd_invPCR <i>Hind</i> III) | GTGCCGTTCTAGAAGCTTTGTACCGTGCTATGG                     | Primer for mutagenesis, <i>Hind</i> III                |
| pGEM699;    | P586 (SP_0893frw KO)                  | GATAACTTCGGTGGGCAAGA                                  | Primer for mutagenesis                                 |
| pGEM700     | P587 (SP_0893rev KO)                  | GCAATTCGAGATTGGTTTCG                                  | Primer for mutagenesis                                 |
|             | P588 (SP_0893invPCR_rev)              | GTAGTGGATCCGCGTATAAGTTGGTGGCG                         | Primer for mutagenesis; <i>Bam</i> HI                  |
|             | P589 (SP_0893invPCR_fwd)              | CTGTCTTATCAAGCTTGAAGATGCAGATAC                        | Primer for mutagenesis, <i>Hind</i> III                |
| pGEM703;    | P590 (SP_1203fwd)                     | GATAACTTCGGTGGGCAAGA                                  | Primer for mutagenesis                                 |
| pGEM704     | P591 (SP_1203rev)                     | GCAATTCGAGATTGGTTTCG                                  | Primer for mutagenesis                                 |
|             | P594 (SP_1203invPCR_rev)              | CGATTGGATCCTCTGTACCAATCTTC                            | Primer for mutagenesis; <i>Bam</i> HI                  |
|             | P595 (SP_1203invPCR_fw)               | GCCAGAAGCTTGAAGTCTAGCAGAGGAAATC                       | Primer for mutagenesis, <i>Hind</i> III                |
| pGEM708;    | M27 (argR_fwd)                        | GTGACAAGCTATCTCCGATAACAG                              | Primer for mutagenesis                                 |
| pGEM709     | M28 (argR_rev)                        | CTGAGTCCGATGAACATACTGG                                | Primer for mutagenesis                                 |
|             | M65 (argR_rev_invPCR <i>Bam</i> HI)   | ATTAACTGATGAGGATCCCTTTTTCTCATA                        | Primer for mutagenesis; <i>Bam</i> HI                  |
|             | P595 (SP_2077invPCR_fwd)              | GGAAGATCGATTGCTAGATTGATGAAAG                          | Primer for mutagenesis, <i>Cl</i> I                    |
| <i>ermB</i> | T99                                   | CCCGGGGAAATTTTGATATCGATGGATCCGAATTCGACGGTTCGTGTCTGCTG | Primer for mutagenesis; <i>Bam</i> HI                  |
|             | T100                                  | CCCGGGGAAATTTTGATATCGATAAGCTTGAATTCGACGGTTCGTGTCTGCTG | Primer for mutagenesis, <i>Hind</i> III                |
| pGEM867;    | P370                                  | CGGGATCCGCAAATAAAGCAGTAAATGAC                         | Primer for mutagenesis                                 |
| pGEM868     | P721                                  | GACTCTAGAGGATCCCCGGGTCAACAGACACTCATCCACATTC           | Primer for mutagenesis                                 |
|             | P913                                  | CTATTTGGGGATCGATTCTCTATCCTCAGG                        | Primer for mutagenesis                                 |
|             | P1121                                 | GCGTCTACGCTGACTGTATA                                  | Primer for mutagenesis                                 |
| pET698      | P596 (SP_2148fwd)                     | GGGCGCTAGCTCTTCACATCCAATTCAGGTC                       | S primer for ArcA expression vector; <i>Nhe</i> I      |
|             | P597 (SP_2148rev)                     | GCGGCCAAGCTTACTTCTTCACGTC                             | AS primer for ArcA expression vector; <i>Hind</i> III  |
| pET883      | P726 (SP_2150fwd)                     | GGGCGCTAGCACAAATTCAGTATTCCAAGG                        | S primer for ArcB expression vector; <i>Nhe</i> I      |
|             | P727 (SP_2150rev)                     | GCGGCCAAGCTTATACTTTAGGAATATAAAG                       | AS primer for ArcB expression vector; <i>Hind</i> III  |
| pET885      | P728 (SP_2151fwd)                     | GGGCGCTAGCGCAAATCGTAAAAATGTAG                         | S primer for ArcC expression vector; <i>Nhe</i> I      |
|             | P729 (SP_2151rev)                     | GCGGCCGAGCTCTTATCCTTTTTCAATAATG                       | AS primer for ArcC expression vector; <i>Sac</i> I     |
| pET702      | P584 (SP_0893fwd)                     | GGGCGCTAGCAATAAATCAGAACACCGCCAC                       | S primer for ArgR2 expression vector; <i>Nhe</i> I     |
|             | P585 (SP_0893rev)                     | GCGGCCAAGCTTATTCTTCAAAGAAAAATG                        | AS primer for ArgR2 expression vector; <i>Hind</i> III |
| pET706      | P592 (SP_1203fwd)                     | GGGCGCTAGCAATAAAAAAGAGAGACTTG                         | S primer for AhrC expression vector; <i>Nhe</i> I      |
|             | P593 (SP_1203rev)                     | GCGGCCAAGCTTACCAATTTTTACTTG                           | AS primer for AhrC expression vector; <i>Hind</i> III  |
| pET711      | P552 (SP_2077fwd)                     | GGGCGCTAGCAGAAAAAGAGATCGTCATCAG                       | S primer for ArgR1 expression vector; <i>Nhe</i> I     |
|             | P553 (SP_2077rev)                     | GCGGCCAAGCTTACTTATCTTTTCATCAAATC                      | AS primer for ArgR1 expression vector; <i>Hind</i> III |
| RT-PCR      | M56                                   | GAACGTGAAGAAGCTTAATCGCTGTTCTCGATATTCG                 | S primer for RT-PCR FI                                 |

|                  |                    |                                                  |                                         |
|------------------|--------------------|--------------------------------------------------|-----------------------------------------|
|                  | M10                | GCACCTGTTACGAGCAAGCTG                            | AS primer for RT-PCR FI                 |
|                  | M58                | GCTACACTTGGTAAGCTTTATATTCTAAA<br>GTATAATTTAG     | S primer for RT-PCR FII                 |
|                  | M59                | GGGTCAGAAGAAAGGATCCCATTTCCTCC<br>CAAAGCTAC       | AS primer for RT-PCR FII                |
|                  | M60                | CCAAAAGTAGAAGCAGCTAAAGCTTTTGT<br>CAATGGTCGTCC    | S primer for RT-PCR FIII                |
|                  | P558               | CAATAATACGGTGTAAGATGAAGGCATC                     | AS primer for RT-PCR FIII               |
|                  | M62                | CCTTCTTCCTTGGAAGCTTCCTTCATTC<br>CTATAAAA         | S primer for RT-PCR FIV                 |
|                  | M22                | GCCAATCTGCTTCATCACCTGATGG                        | AS primer for RT-PCR FIV                |
|                  | 522                | CTCGTTACGGTGGTCTTGGT                             | S primer for RT-PCR<br>Enolase          |
|                  | 523                | GTAGTCAGCAGCAGCAGCAG                             | AS primer for RT-PCR<br>Enolase         |
|                  | P584               | GGGCGCTAGCAATAAATCAGAACACCGCC<br>AC              | S primer for RT-PCR of<br><i>argR2</i>  |
|                  | P585               | GCGCCAAGCTTATTCTCAAAGAAAAAT<br>G                 | AS primer for RT-PCR of<br><i>argR2</i> |
| Northern<br>Blot | P611 (NB_arcA_fwd) | TGCCGACTATCTTGAAAGG                              | S primer for arcA probe                 |
|                  | P704 (NBarcA_T7)   | CTAATACGACTCACTATAGGGAGAAGCAA<br>ATTCAAAGGCCAAAA | AS primer for arcA probe                |
|                  | P933 (NB_arcB_fwd) | GTCTTTCAGCTCACTTGAAAG                            | S primer for arcB probe                 |
|                  | P934 (NB_arcB_T7)  | CTAATACGACTCACTATAGGGAGAGCACC<br>TGTACGAGCAAGC   | AS primer for arcB probe                |
|                  | P935 (NB_arcC_fwd) | GTTGAAACAGCTAAGCATCTTG                           | S primer for arcC probe                 |
|                  | P936 (NB_arcC_T7)  | CTAATACGACTCACTATAGGGAGACGCCA<br>GCCACGGCCAGCATC | AS primer for arcC probe                |
|                  | P613 (NB_arcD_fwd) | CAGCGCAACTATGGGTATCA                             | S primer for arcDT probe                |
|                  | P705 (NB_arcD_T7)  | CTAATACGACTCACTATAGGGAGAACGCG<br>CTTTTTGAACTGAAT | AS primer for arcDT probe               |
| EMSA             | P952               | GAGCATCTTCCAAGAAAGG                              | <i>arcA</i> promoter region             |
|                  | P1136              | CAGATCCAAGTGATAACCAG                             | <i>arcA</i> promoter region             |
|                  | M60                | CCAAAAGTAGAAGCAGCTAAAGCTTTTGT<br>CAATGGTCGTCC    | <i>arcD</i> promoter region             |
|                  | P558               | CAATAATACGGTGTAAGATGAAGGCATC                     | <i>arcD</i> promoter region             |
|                  | P964               | ATAGCGTCTTTGCTCATCCG                             | <i>enolase</i> promoter region          |
|                  | P965               | TTCAAGTGTTGGGTACCGC                              | <i>enolase</i> promoter region          |
